# Supplementary material
Source: ML conference proceedings conference paper supplement (https://openaccess.thecvf.com/content/WACV2021/html/Wei_Learn_Like_a_WACV_2021_paper.html)
Supplement: Supplementary file 1 [file Wei_Learn_Like_a_WACV_2021_supplemental.pdf]

## **Supplementary Materials**

Figure 8 on the next page shows the correlation between difficulty as perceived by a pre-trained model and pathologist annotators. Table 4 on the next page lists examples of medical image classification tasks from prior work where we believe annotator agreement data to be accessible.

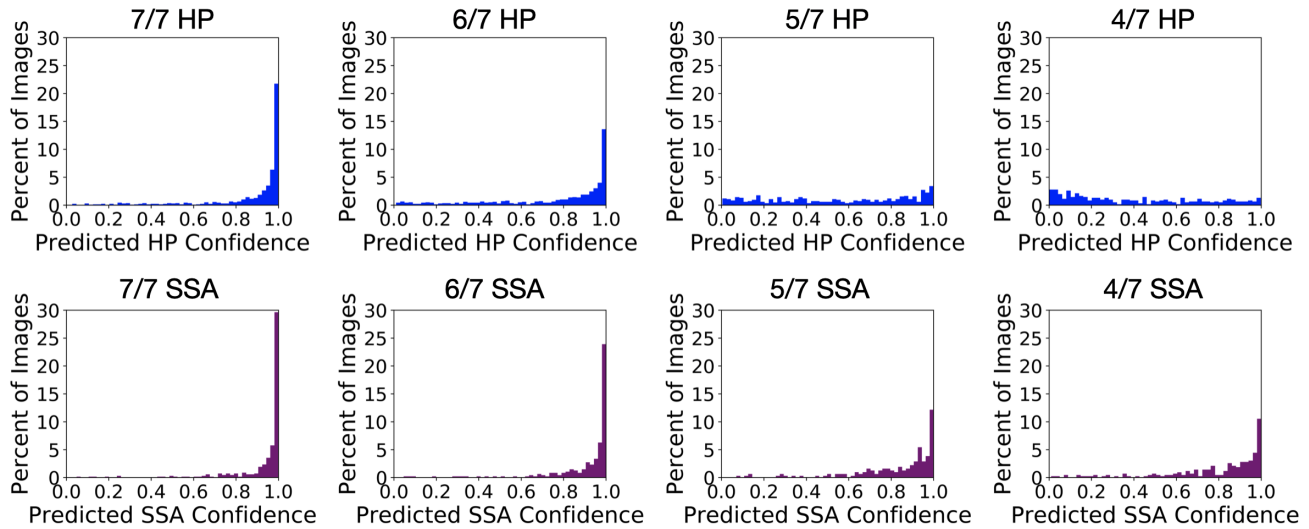

Figure 8: Distribution of predicted confidences by a pre-trained model fine-tuned on our dataset for different annotator agreement levels (indicated above each plot).

| Dataset                          | Annotators | Resolution Method          |
|----------------------------------|------------|----------------------------|
| Head CT Scans [18]               | 3          | Majority Vote              |
| Lymph Node Metastases [20]       | 3          | Senior Expert Verification |
| Diabetic Retinopathy [23]        | 7          | Majority Vote              |
| Chest Radiograph [24]            | 3          | Majority Vote              |
| Lung Carcinoma [25]              | 3          | Senior Expert Verification |
| Follicular Lymphoma Grading [27] | 5          | Majority Vote              |
| Ulcer Recognition [28]           | 3          | Senior Expert Verification |
| Colorectal Polyps [17]           | 5          | Majority Vote              |
| Breast Cancer [29]               | 3          | Senior Expert Verification |

Table 4: Examples of image classification tasks from prior work where annotator agreement is accessible in principle.
